# Supplementary material for: Reaction of a bis(pentafulvene)titanium complex with an N-heterocyclic olefin: C–H-activation leads to resonance between a titanium vinyl and titanium alkylidene complex
Source: Royal Society of Chemistry journal article supplement (doi:10.1039/d2dt00014h), 2022-01-01
Supplement: d2dt00014h1.pdf [file d2dt00014h1.pdf]

## Supporting Information

### Reaction of a Bis(pentafulvene)titanium Complex with an *N*-heterocyclic Olefin: C–H-Activation Leads to Resonance Between a Titanium Vinyl and Titanium Alkylidene Complex

Malte Fischer,<sup>ab\*</sup> Matthew M. D. Roy,<sup>c</sup> Sascha Hüller,<sup>b</sup> Marc Schmidtman,<sup>b</sup> and Rüdiger Beckhaus<sup>b\*</sup>

- <sup>a</sup> Dr. M. Fischer  
Inorganic Chemistry Laboratory, Department of Chemistry, University of Oxford, South Parks Road, Oxford, OX1 3QR
- <sup>b</sup> Dr. M. Fischer, S. Hüller, Dr. M. Schmidtman, Prof. Dr. R. Beckhaus  
Institut für Chemie, Fakultät für Mathematik und Naturwissenschaften, Carl von Ossietzky Universität Oldenburg, Postfach 2503, D-26111 Oldenburg, Germany
- <sup>c</sup> Dr. M. M. D. Roy  
Department of Chemistry, Catalysis Research Center and Institute for Silicon Chemistry, Technische Universität München, Germany

#### Table of Contents

|                                       |            |
|---------------------------------------|------------|
| <b>General Considerations</b>         | <b>S2</b>  |
| <b>Synthesis and Characterization</b> | <b>S3</b>  |
| <b>NMR-Spectra</b>                    | <b>S5</b>  |
| <b>Crystallographic Data</b>          | <b>S9</b>  |
| <b>Computational Details</b>          | <b>S11</b> |
| <b>References</b>                     | <b>S15</b> |

## General Considerations

All reactions were carried out under an inert atmosphere of argon or nitrogen with rigorous exclusion of oxygen and moisture using standard glovebox and Schlenk techniques unless stated otherwise. The glass equipment was stored in an oven at 120 °C prior to use. Solvents and liquid starting materials were dried according to standard procedures. Solvent were distilled over Na/K alloy and benzophenone or CaH<sub>2</sub> under nitrogen atmosphere. Solid materials were stored and weighted in a glovebox and dried under high vacuum prior to use. The bispentafulvene titanium complexes **1a,b** were synthesized according to literature procedures.<sup>[1a,b]</sup> 1,3,4,5-Tetramethyl-2-methyleneimidazoline (**2**) was synthesized according to literature procedures.<sup>[2a-c]</sup>

NMR spectra were recorded on Bruker Avance 300, Bruker Avance 500, and Bruker Avance III 500 spectrometers. <sup>1</sup>H NMR spectra were referenced to the residual solvent resonance as internal standard (benzene-d<sub>6</sub> (C<sub>6</sub>D<sub>6</sub>): δ<sup>1</sup>H(C<sub>6</sub>D<sub>5</sub>H) = 7.16 ppm) and <sup>13</sup>C{<sup>1</sup>H} spectra were referenced by using the central line of the solvent signal (benzene-d<sub>6</sub> (C<sub>6</sub>D<sub>6</sub>): δ<sup>13</sup>C{<sup>1</sup>H}(C<sub>6</sub>D<sub>6</sub>) = 128.06 ppm). The given chemical shifts of <sup>15</sup>N result out of <sup>15</sup>N,<sup>1</sup>H HMQC NMR experiments with nitromethane as external standard (δ = 378.9 vs. NH<sub>3</sub>).

Infrared spectra were performed on a Bruker Tensor 27 spectrometer with a MKII Reflection Golden Gate Single Diamond ATR system.

Elemental analyses were carried out on a EuroEA 3000 Elemental Analyzer.

Melting points were determined using a “Mel-Temp” apparatus by Laboratory Devices, Cambridge, U.K..

## Synthesis and characterization of compounds

### Synthesis of 3:

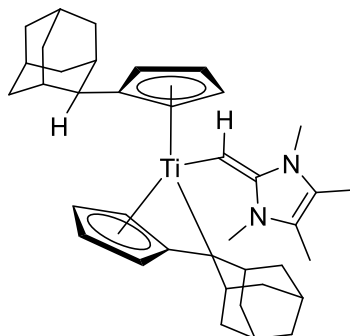

Complex **1a** (0.500 g, 1.125 mmol) and 1,3,4,5-Tetramethyl-2-methyleneimidazoline (0.155 g, 1.125 mmol) were dissolved in 15 mL of *n*-hexane. The color of the reaction mixture changes from dark blue to magenta. The reaction mixture was stirred for 16 h at room temperature. All volatile components were removed under vacuum to yield complex **3** as a magenta solid. No further purification steps are required.

Crystals suitable for single-crystal X-ray diffraction were obtained from a saturated *n*-hexane/toluene solution of **3** at -26 °C.

**Yield:** 0.618 g (1.061 mmol, 94%).

**Melting point:** >250 °C.

**IR** (ATR):  $\tilde{\nu}$  = 2898, 2846, 1644, 1601, 1538, 1489, 1448, 1410, 1388, 1352, 1339, 1259, 1209, 1096, 1059, 1032, 948, 933, 896, 862, 791, 774, 756, 708, 675, 627 cm<sup>-1</sup>.

**<sup>1</sup>H NMR** (500 MHz, C<sub>6</sub>D<sub>6</sub>, 305 K):  $\delta$  = 1.45 (s, 6H, 2×C<sub>q</sub>CH<sub>3</sub>), 1.48-2.60 (m, 28H, CH<sub>Ad</sub>/CH<sub>2,Ad</sub>), 2.81 (s, 6H, 2×NCH<sub>3</sub>), 3.02 (s, 1H, CH<sub>exo</sub>), 4.30-4.31 (m, 1H, C<sub>5</sub>H<sub>4</sub>), 5.01-5.02 (m, 1H, C<sub>5</sub>H<sub>4</sub>), 5.29-5.30 (m, 1H, C<sub>5</sub>H<sub>4</sub>), 5.38-5.39 (m, 1H, C<sub>5</sub>H<sub>4</sub>), 5.59-5.60 (m, 1H, C<sub>5</sub>H<sub>4</sub>), 6.27-6.30 (m, 2H, 2×C<sub>5</sub>H<sub>4</sub>), 6.46-6.47 (m, 1H, C<sub>5</sub>H<sub>4</sub>), 7.17 (s, <sup>1</sup>J<sub>C,H</sub> = 118.5 Hz, 1H, TiCH) ppm.

**<sup>13</sup>C{<sup>1</sup>H} NMR** (126 MHz, C<sub>6</sub>D<sub>6</sub>, 305 K):  $\delta$  = 8.8 (2×C<sub>q</sub>CH<sub>3</sub>), 28.5 (CH<sub>Ad</sub>), 28.6 (CH<sub>Ad</sub>), 29.5 (CH<sub>Ad</sub>), 30.0 (CH<sub>Ad</sub>), 32.3 (2×NCH<sub>3</sub>), 32.6 (CH<sub>2,Ad</sub>), 32.7 (CH<sub>2,Ad</sub>), 32.8 (CH<sub>Ad</sub>), 33.1 (CH<sub>Ad</sub>), 36.2 (CH<sub>Ad</sub>), 37.5 (CH<sub>2,Ad</sub>), 38.6 (CH<sub>2,Ad</sub>), 39.0 (CH<sub>Ad</sub>), 39.1 (CH<sub>2,Ad</sub>), 39.47 (CH<sub>2,Ad</sub>), 39.49 (CH<sub>2,Ad</sub>), 40.0 (CH<sub>2,Ad</sub>), 44.2 (CH<sub>2,Ad</sub>), 45.0 (CH<sub>2,Ad</sub>), 45.6 (CH<sub>exo</sub>), 100.7 (C<sub>5</sub>H<sub>4</sub>), 103.6 (C<sub>5</sub>H<sub>4</sub>), 105.1 (C<sub>5</sub>H<sub>4</sub>), 106.0 (C<sub>5</sub>H<sub>4</sub>), 108.3 (C<sub>5</sub>H<sub>4</sub>), 109.4 (C<sub>5</sub>H<sub>4</sub>), 110.4 (C<sub>5</sub>H<sub>4</sub>), 111.1 (C<sub>q,exo</sub>), 112.1 (C<sub>5</sub>H<sub>4</sub>), 117.6 (2×C<sub>q</sub>CH<sub>3</sub>), 123.7 (C<sub>q,ipso</sub>), 124.7 (C<sub>q,ipso</sub>), 160.4 (C<sub>q</sub>=CH), 166.7 (TiCH) ppm.

**<sup>13</sup>C Gated Decoupling NMR** (126 MHz, C<sub>6</sub>D<sub>6</sub>, 305 K):  $\delta = 166.7$  (d,  $^1J_{C,H} = 117.4$  Hz, TiCH) ppm.

**<sup>15</sup>N NMR** (51 MHz, C<sub>6</sub>D<sub>6</sub>, 305 K):  $\delta = 123.4$  ppm.

**EA:** Anal. calcd. for C<sub>38</sub>H<sub>50</sub>N<sub>2</sub>Ti: C, 78.33; H, 8.65; N, 4.81; Found: C, 78.67; H, 8.73; N, 4.87.

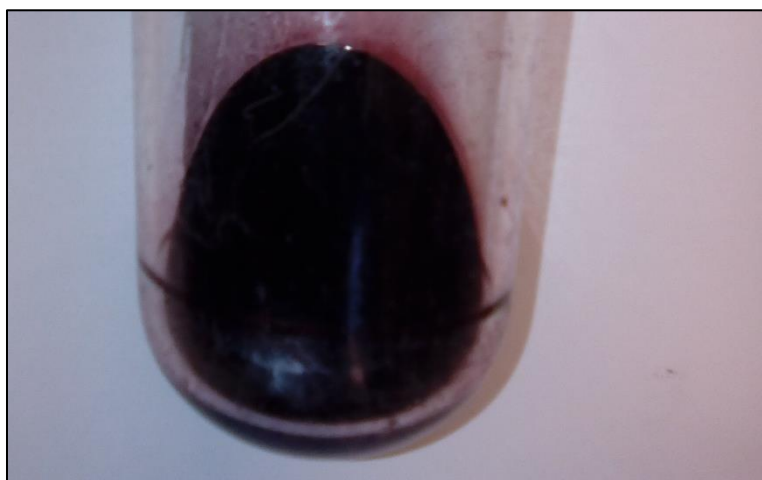

**Figure S1.** Magenta colored solution of **3** in *n*-hexane after 15 minutes of vigorous stirring of the reaction mixture.

#### Reaction of **1b** with **2**:

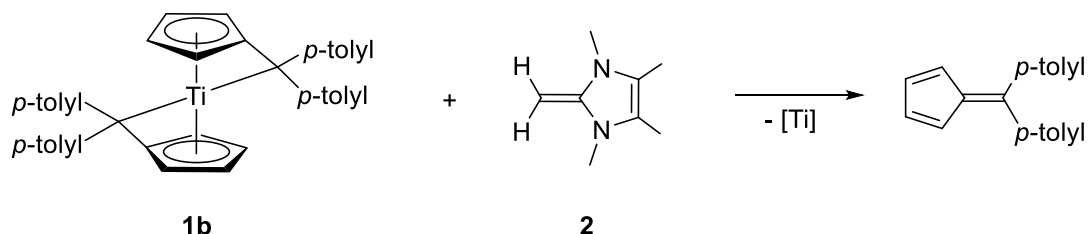

Complex **1b** (0.100 g, 0.177 mmol) and 1,3,4,5-Tetramethyl-2-methyleneimidazoline (0.024 g, 0.177 mmol) were dissolved in 8 mL of *n*-hexane. The color of the reaction mixture changed from a deep green to yellow-green. The reaction mixture was stirred for 16 h at room temperature. All volatile components were removed under vacuum and the residue was analyzed by <sup>1</sup>H-NMR spectroscopy, which verified the release of di-*p*-tolylpentafulvene. Same results were obtained by reacting **1b** with **2** in different solvents (toluene, tetrahydrofuran) and/or starting the reaction at -80 °C. Figure S7 shows the <sup>1</sup>H NMR spectrum of the di-*p*-tolylpentafulvene and a representative <sup>1</sup>H NMR spectrum of the abovementioned reaction.

## NMR-Spectra

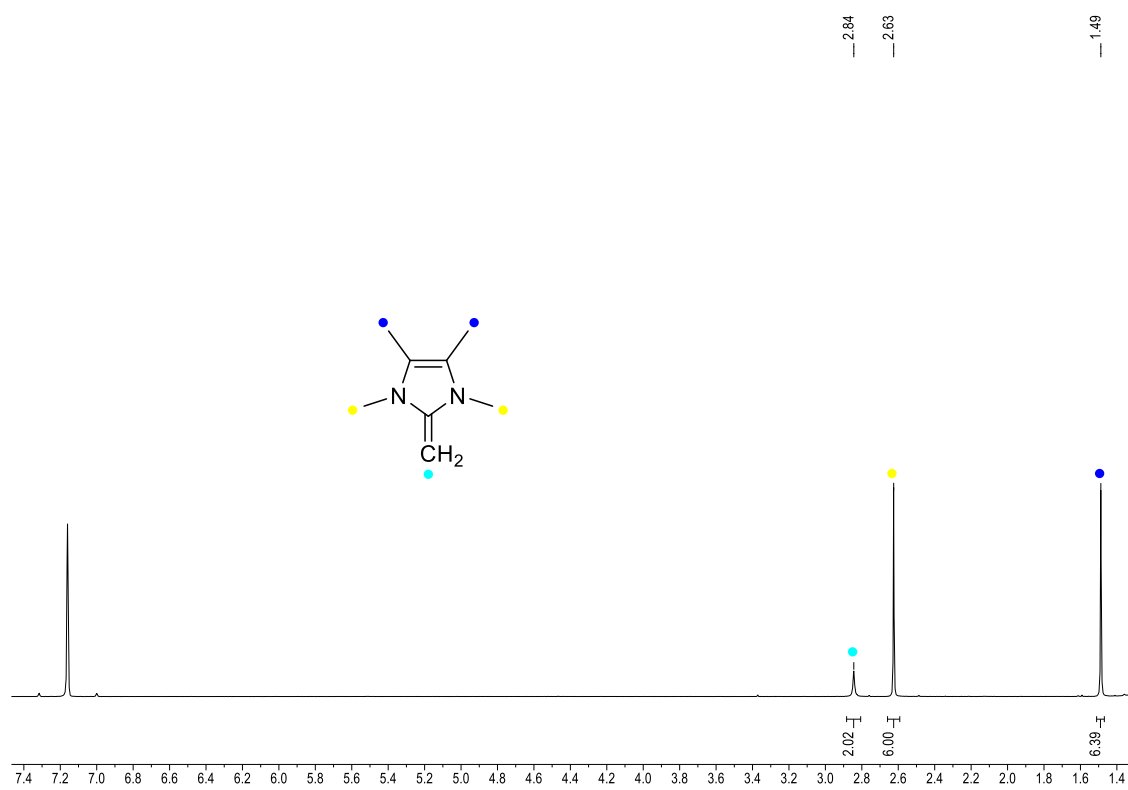

**Figure S2:** <sup>1</sup>H NMR spectrum of **2** (500 MHz, C<sub>6</sub>D<sub>6</sub>, rt).

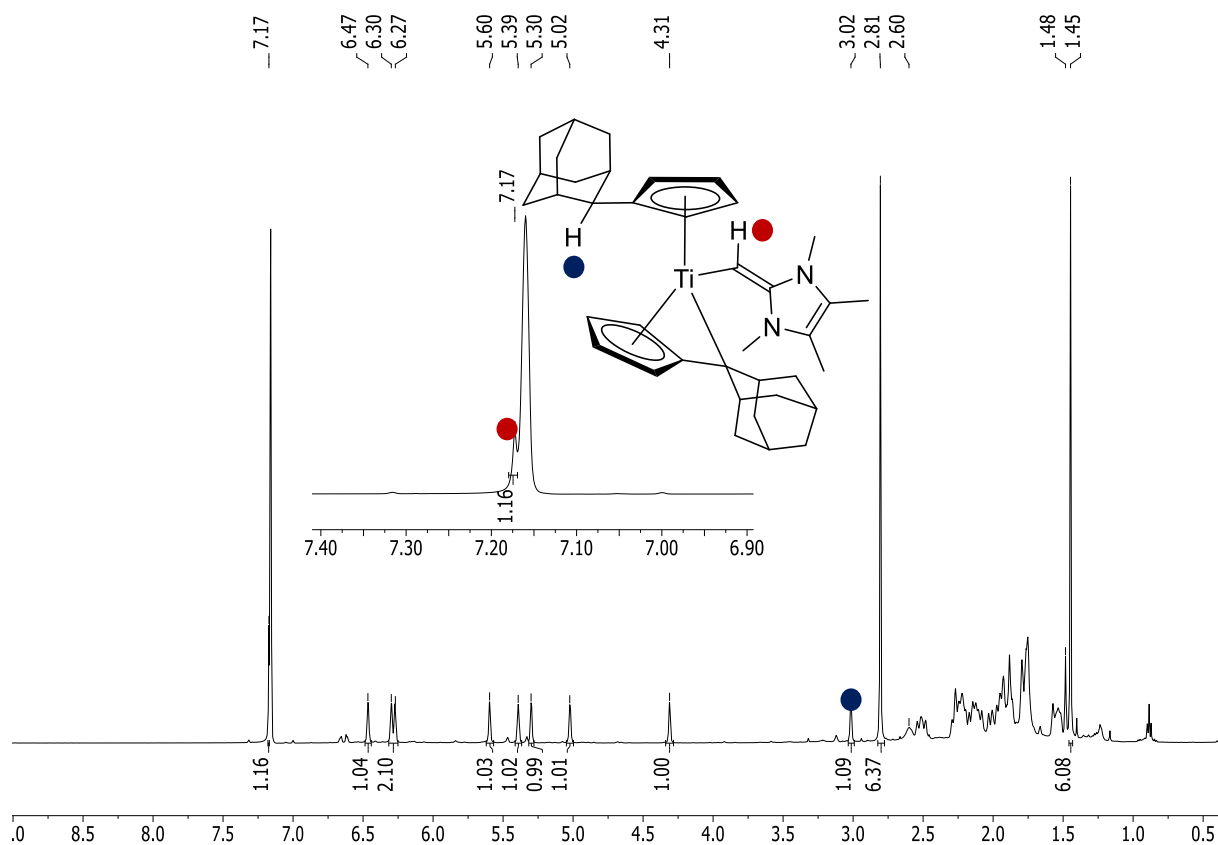

**Figure S3:**  $^1\text{H}$  NMR spectrum of **3** (500 MHz,  $\text{C}_6\text{D}_6$ , rt).

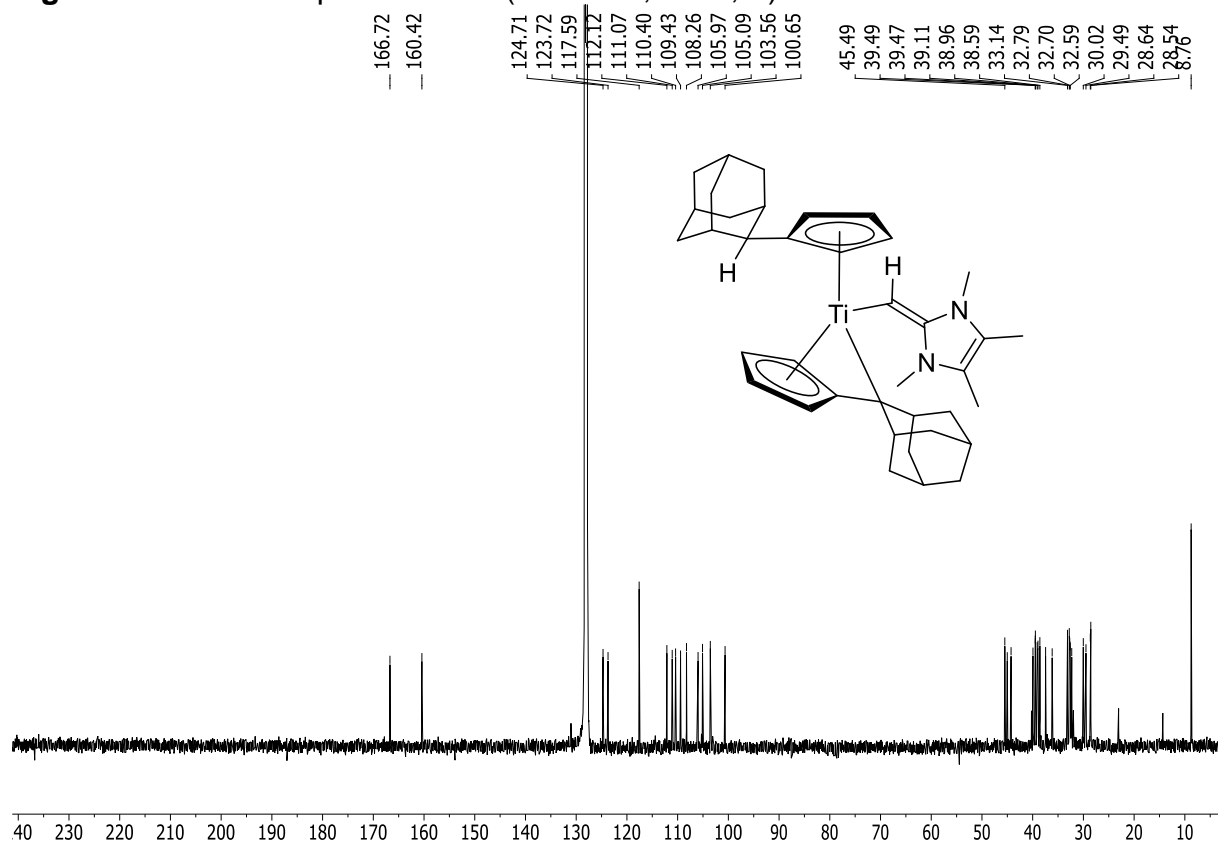

**Figure S4:**  $^{13}\text{C}\{^1\text{H}\}$  NMR spectrum of **3** (126 MHz,  $\text{C}_6\text{D}_6$ , rt).

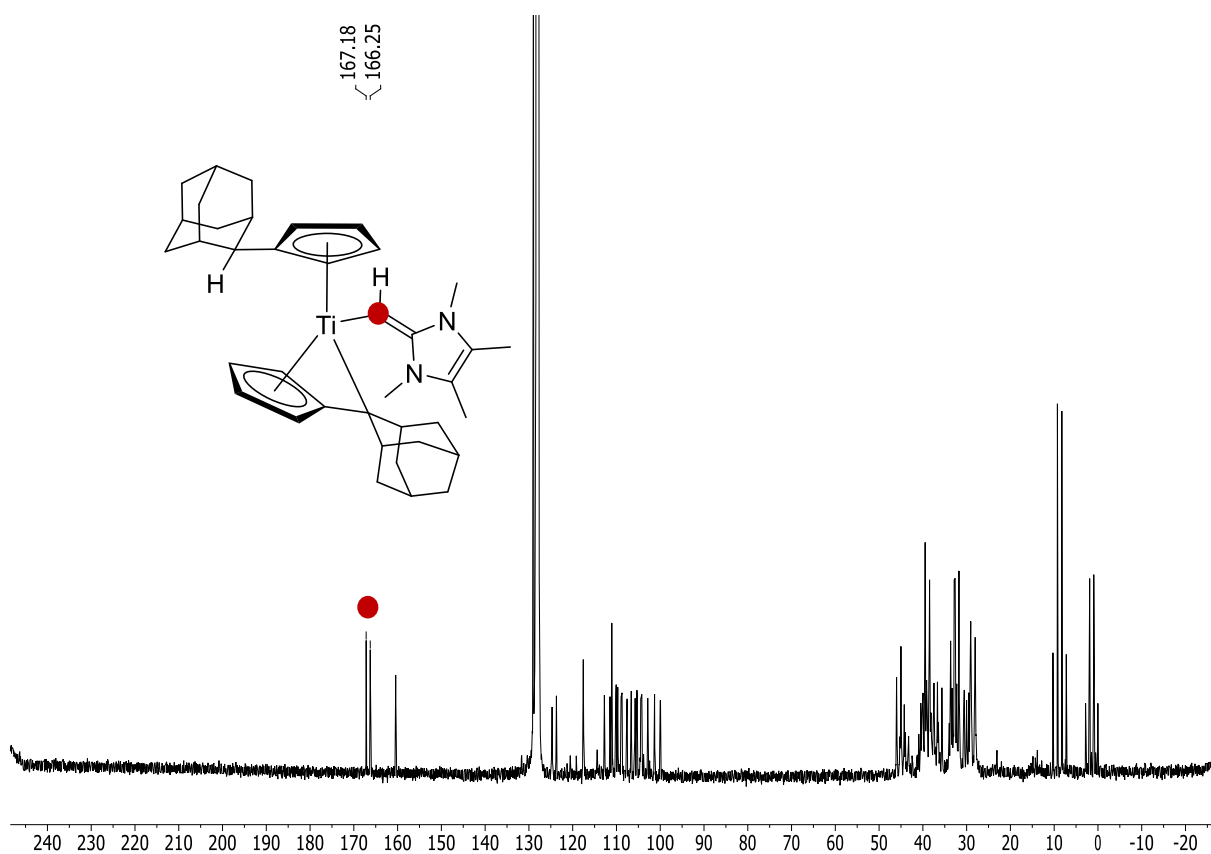

**Figure S5:**  $^{13}\text{C}$  gated decoupling NMR spectrum of **3** (126 MHz,  $\text{C}_6\text{D}_6$ , rt).

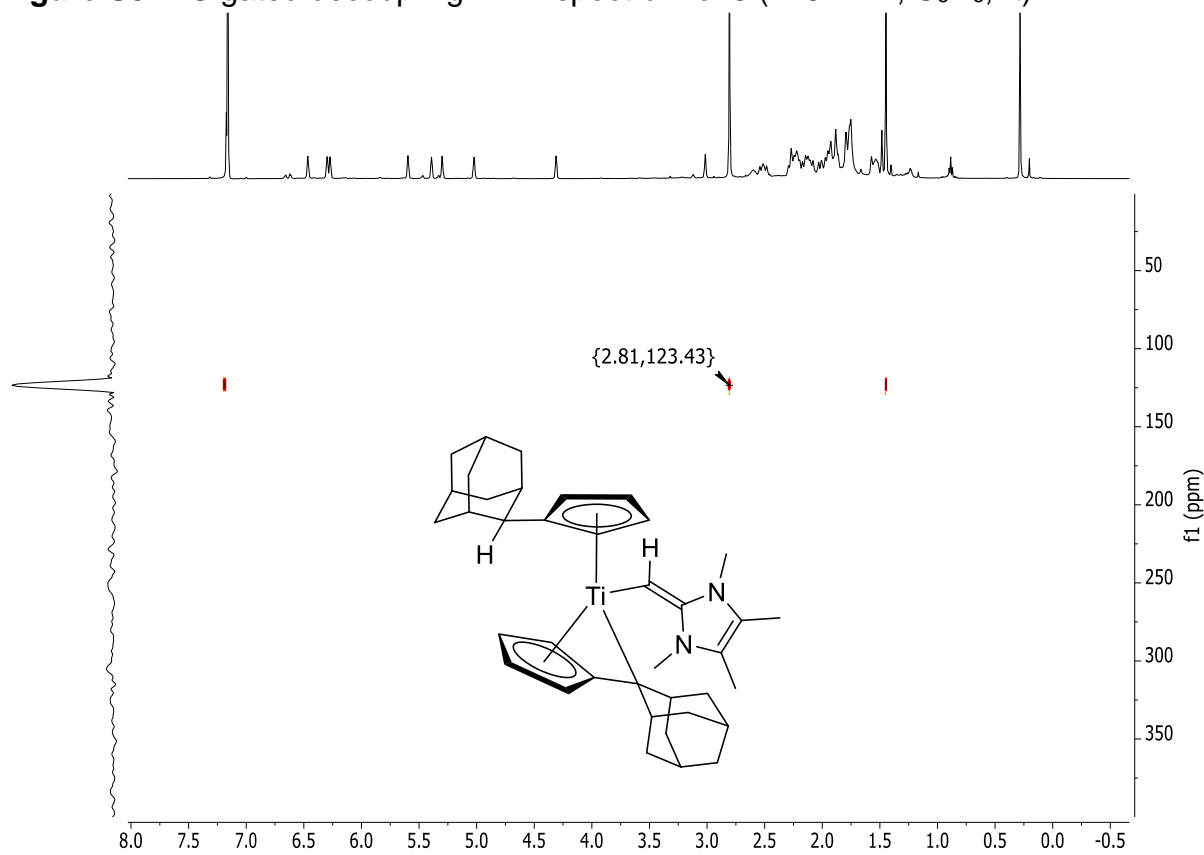

**Figure S6:**  $^{15}\text{N}/^1\text{H}$  HMBC NMR spectrum of **3** (51 MHz,  $\text{C}_6\text{D}_6$ , rt).

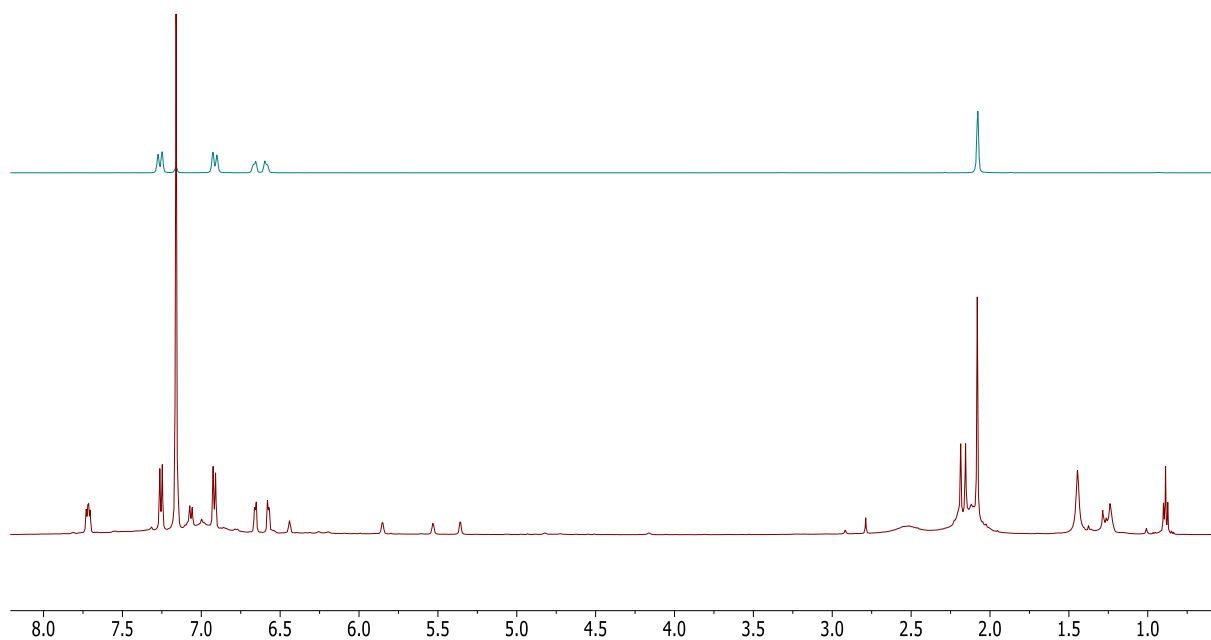

**Figure S7:** <sup>1</sup>H NMR spectrum of the reaction of **1b** with the NHO **2** (bottom) (500 MHz, C<sub>6</sub>D<sub>6</sub>, rt), and <sup>1</sup>H NMR spectrum of di-*p*-tolylpentafulvene (top) (300 MHz, C<sub>6</sub>D<sub>6</sub>, rt).



## Crystallographic Data

Suitable crystals were selected and measured on a 'Bruker APEX-II CCD' diffractometer with graphite-monochromated Mo-K $\alpha$  radiation ( $\lambda = 0.71073 \text{ \AA}$ ). The crystal was kept at 100.15 K during data collection. Using Olex2,<sup>[3]</sup> the structure was solved with the ShelXS<sup>[4]</sup> structure solution program using Direct Methods and refined with the ShelXL<sup>[5]</sup> refinement package using Least Squares minimisation.

**Table S1:** Crystal Structure Data for Compound **3**.

|                                                     | <b>3</b>                                          |
|-----------------------------------------------------|---------------------------------------------------|
| CCDC                                                | 2126498                                           |
| empirical formula                                   | C <sub>38</sub> H <sub>50</sub> N <sub>2</sub> Ti |
| fw                                                  | 582.70                                            |
| colour                                              | Violet                                            |
| Habit                                               | block                                             |
| cryst dimens, mm                                    | 0.40 x 0.25 x 0.10                                |
| cryst syst                                          | orthorhombic                                      |
| space group                                         | <i>Pccn</i>                                       |
| a, $\text{\AA}$                                     | 14.7397(7)                                        |
| b, $\text{\AA}$                                     | 18.1959(9)                                        |
| c, $\text{\AA}$                                     | 22.9425(11)                                       |
| $\alpha$ , deg                                      | 90                                                |
| $\beta$ , deg                                       | 90                                                |
| $\gamma$ , deg                                      | 90                                                |
| V, $\text{\AA}^3$                                   | 6153.2(5)                                         |
| Z                                                   | 8                                                 |
| D <sub>calcd</sub> , g cm <sup>-3</sup>             | 1.258                                             |
| $\mu$ , mm <sup>-1</sup>                            | 0.308                                             |
| T, K                                                | 100(2)                                            |
| $\theta$ range, deg                                 | 1.775 – 33.141                                    |
| no. of rflns collected                              | 278457                                            |
| no. of indep rflns                                  | 11725                                             |
| (R(int))                                            | (0.0539)                                          |
| no. of rflns with $I > 2\sigma(I)$                  | 9450                                              |
| abs cor                                             | semi-empirical                                    |
| max, min transmission                               | 1.0000 and 0.9614                                 |
| final R indices                                     | R1 = 0.0497                                       |
| [ $I > 2\sigma(I)$ ]                                | wR2 = 0.1301                                      |
| R indices (all data)                                | R1 = 0.0642                                       |
|                                                     | wR2 = 0.1417                                      |
| GOF on F <sup>2</sup>                               | 1.028                                             |
| largest diff peak / hole<br>(e. $\text{\AA}^{-3}$ ) | 2.007 / -0.795                                    |

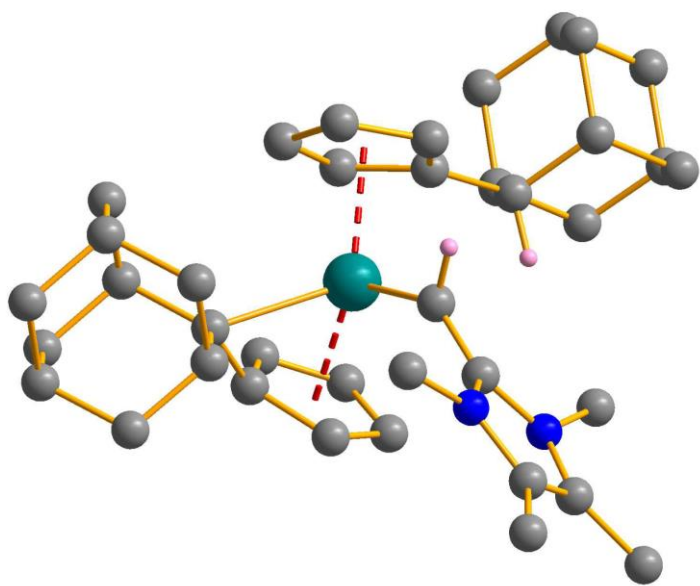

**Figure S8:** Molecular structure of **3**.

## Computational Details

Energy (E) = -2437.03189758 a.u.

Enthalpy (H) = -2436.184091 a.u.

Free Energy (G) = -2436.284575 a.u.

### Cartesian coordinates of the optimized geometry

|    |             |             |             |
|----|-------------|-------------|-------------|
| Ti | -0.32960200 | -0.71720600 | 0.27713500  |
| C  | -1.89027900 | -0.83992800 | 1.75128900  |
| C  | -1.37513600 | 0.48150600  | 1.97202500  |
| H  | -1.85436300 | 1.39914300  | 1.67702200  |
| C  | -0.08488200 | 0.38614000  | 2.51088600  |
| H  | 0.54994300  | 1.21205800  | 2.78387500  |
| C  | 0.22391900  | -0.97804400 | 2.68228200  |
| H  | 1.14753600  | -1.37048800 | 3.08091400  |
| C  | -0.88195500 | -1.72997400 | 2.26283600  |
| H  | -0.91999000 | -2.80609400 | 2.21046100  |
| C  | -2.57482500 | -1.16386900 | 0.52096800  |
| C  | -3.15894700 | -2.56673200 | 0.37529400  |
| H  | -2.46610700 | -3.31512900 | 0.76410000  |
| C  | -3.47405800 | -2.87572600 | -1.09383400 |
| H  | -2.55920400 | -2.85898600 | -1.68839000 |
| H  | -3.90193500 | -3.88001600 | -1.17417900 |
| C  | -4.46630100 | -1.84357600 | -1.63901700 |
| H  | -4.67783400 | -2.05838100 | -2.68968000 |
| C  | -3.85305200 | -0.44495200 | -1.51163400 |
| H  | -2.92669300 | -0.38497900 | -2.09181900 |
| H  | -4.54767200 | 0.30085700  | -1.91353100 |
| C  | -3.55575500 | -0.13685000 | -0.03893900 |
| H  | -3.13055400 | 0.86483300  | 0.03851200  |
| C  | -4.46970900 | -2.64079100 | 1.18410400  |
| H  | -4.89546400 | -3.64683900 | 1.10958100  |
| H  | -4.25862200 | -2.44680100 | 2.23915600  |
| C  | -5.76611200 | -1.90909700 | -0.82793400 |
| H  | -6.21607500 | -2.90174400 | -0.92607600 |
| H  | -6.48748800 | -1.18431400 | -1.21783500 |

|   |             |             |             |
|---|-------------|-------------|-------------|
| C | -4.86824500 | -0.20535900 | 0.76402200  |
| H | -4.66735000 | 0.03445600  | 1.81185200  |
| H | -5.57810500 | 0.53703500  | 0.38389300  |
| C | -5.46995900 | -1.61013300 | 0.64688200  |
| H | -6.39606400 | -1.66350700 | 1.22498300  |
| C | 1.82815400  | -1.52962700 | -0.42198600 |
| C | 1.13820000  | -1.13348200 | -1.59500800 |
| H | 1.39732400  | -0.29584800 | -2.21891300 |
| C | 0.01696700  | -1.96409000 | -1.76906900 |
| H | -0.70491700 | -1.89355400 | -2.56731200 |
| C | 0.00997900  | -2.90471600 | -0.71386100 |
| H | -0.71795700 | -3.68527500 | -0.56163200 |
| C | 1.13014600  | -2.64702000 | 0.09758500  |
| H | 1.38581100  | -3.18275900 | 0.99885500  |
| C | 3.04267300  | -0.87297700 | 0.19296500  |
| H | 2.71986300  | -0.36887600 | 1.11386500  |
| C | 4.13038200  | -1.88565100 | 0.60656800  |
| H | 3.67815800  | -2.66561300 | 1.22466800  |
| C | 5.20401300  | -1.15051900 | 1.41712300  |
| H | 4.75873400  | -0.71412400 | 2.31672500  |
| H | 5.97229800  | -1.85724100 | 1.74438200  |
| C | 5.83943400  | -0.05095800 | 0.55781900  |
| H | 6.59863200  | 0.47736900  | 1.13983500  |
| C | 4.75545100  | 0.93784600  | 0.10815800  |
| H | 4.29953800  | 1.41514500  | 0.98232100  |
| H | 5.20300800  | 1.73076900  | -0.49865600 |
| C | 3.68269200  | 0.20218100  | -0.70507600 |
| H | 2.90962500  | 0.90996400  | -1.01923300 |
| C | 4.76641900  | -2.51825400 | -0.63630200 |
| H | 5.51480600  | -3.25550300 | -0.33092600 |
| H | 4.00432300  | -3.04560800 | -1.21700800 |
| C | 6.48683500  | -0.69227400 | -0.67552900 |
| H | 7.26884900  | -1.39123500 | -0.36370000 |
| H | 6.96387100  | 0.07686800  | -1.29045200 |
| C | 4.34160200  | -0.43300000 | -1.93794400 |

|   |             |             |             |
|---|-------------|-------------|-------------|
| H | 3.59955800  | -0.94739900 | -2.55100900 |
| H | 4.78717500  | 0.35307900  | -2.55523800 |
| C | 5.41972000  | -1.42747400 | -1.49448500 |
| H | 5.88125300  | -1.88231600 | -2.37424200 |
| C | -0.39406400 | 1.08568600  | -0.71344000 |
| H | -0.76350400 | 0.86092000  | -1.71851900 |
| N | 0.17443300  | 3.14479600  | 0.55293400  |
| N | -1.30947500 | 3.34671100  | -1.04931500 |
| C | -0.50192000 | 2.41966000  | -0.42313000 |
| C | -1.10786700 | 4.61911700  | -0.51098700 |
| C | -0.19389300 | 4.49907200  | 0.46727900  |
| C | -2.19120700 | 2.99605300  | -2.13001600 |
| H | -2.87251100 | 3.82002700  | -2.32732000 |
| H | -2.76785700 | 2.10920800  | -1.86168800 |
| H | -1.63030300 | 2.77254500  | -3.04242200 |
| C | -1.87973800 | 5.79922700  | -0.97790700 |
| H | -1.72060500 | 5.98373500  | -2.04255400 |
| H | -1.56915100 | 6.68796300  | -0.43323800 |
| H | -2.95291700 | 5.66573200  | -0.82019400 |
| C | 0.37633200  | 5.50482100  | 1.40057500  |
| H | 1.45928900  | 5.59534000  | 1.28843800  |
| H | 0.17418900  | 5.23281500  | 2.43957500  |
| H | -0.06003700 | 6.48431100  | 1.21644300  |
| C | 1.52393100  | 2.79358300  | 0.95310700  |
| H | 1.66172700  | 1.72695200  | 0.80620200  |
| H | 1.69321300  | 3.03922000  | 2.00188700  |
| H | 2.25740400  | 3.33135800  | 0.34192000  |

**Table S2:** Selected NBOs of the Ti1–C31–C32 unit in **3**.

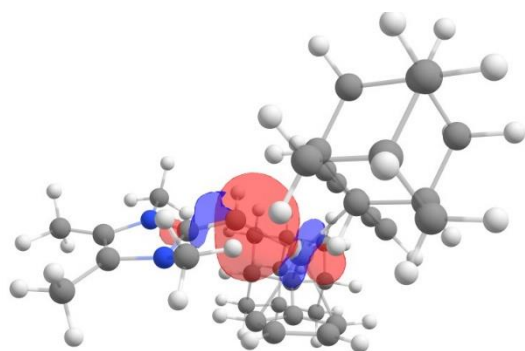

**NBO 2 (Ti1-C31)**

Occupancy: 1.92975 e

26% Ti1 [**s** (11.26%), **p** (16.79%), **d** (71.91%)]

74% C31 [**s** (44.90%), **p** (55.03%)]

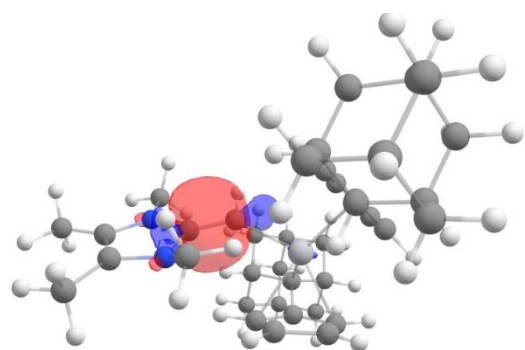

**NBO 81 (C31-C32)**

Occupancy: 1.96940 e

46% C31 [**s** (31.46%), **p** (68.35%)]

54% C32 [**s** (45.30%), **p** (54.66%)]

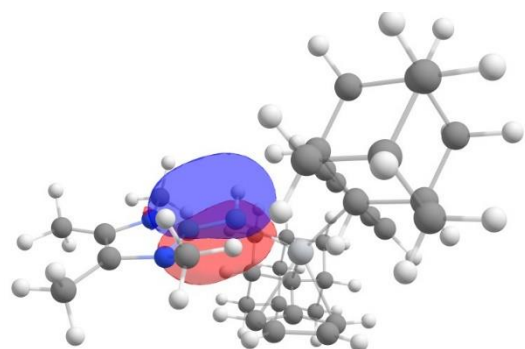

**NBO 82 (C31-C32)**

Occupancy: 1.79427 e

61% C31 [**s** (0.22%), **p** (99.69%)]

39% C32 [**s** (0.08%), **p** (99.83%)]

## References

- [1] a) M. Manßen, N. Lauterbach, J. Dörfler, M. Schmidtman, W. Saak, S. Doye and R. Beckhaus, *Angew. Chem. Int. Ed.*, 2015, **127**, 4383-4387; *Angew. Chem.*, 2015, **127**, 4458-4462; b) M. Diekmann, G. Bockstiegel, A. Lützen, M. Friedemann, W. Saak, D. Haase and R. Beckhaus, *Organometallics*, 2006, **25**, 339-348.
- [2] a) N. Kuhn, H. Bohnen, G. Henkel and J. Kreuzberg, *Z. Naturforsch. B*, 1996, **51**, 1267-1278; b) N. Kuhn, G. Henkel and J. Kreuzberg, *Z. Naturforsch. B*, 1991, **46**, 1706-1712; c) T. Peppel, C. Roth, K. Fumino, D. Paschek, M. Köckerling and R. Ludwig, *Angew. Chem.*, 2011, **123**, 6791-6795; *Angew. Chem. Int. Ed.*, 2011, 50, 6661-6665.
- [3] O. V. Dolomanov , L. J. Bourhis, R. J. Gildea, J. A. K. Howard and H. Puschmann, *Appl. Cryst.*, 2009, **42**, 339-341.
- [4] G.M. Sheldrick, *Acta Cryst.*, 2008, **A64**, 112-122.
- [5] G.M. Sheldrick, *Acta Cryst.*, 2015, **C71**, 3-8.
